# Supplementary material for: Standardized study performance, quality assurance, and quality control in a cluster-randomized trial: the Pneumococcal Vaccine Schedules trial
Source: PubMed Central journal article supplement — Trials. 2024 Dec 18;25:836. doi: 10.1186/s13063-024-08677-7 (PMC11654193; doi:10.1186/s13063-024-08677-7), 2024-12-18
Supplement: 13063_2024_8677_MOESM1_ESM.pdf [file 13063_2024_8677_MOESM1_ESM.pdf]

## **Appendix 1: Index of PVS study-specific and standard operating procedures**

1. Enrolment and consent at health facilities
2. Patient investigation
3. Request and review of chest radiographs
4. Antigen test for Plasmodium falciparum
5. Haemacue haemoglobin
6. Blood culture
7. Lumbar puncture
8. Lung aspiration/Pleural fluid
9. Patient follow-up at health facilities
10. Patient review following isolation of a pathogen
11. Sample collection flow chart
12. Specimen labelling
13. Specimen handling and transport
14. Lab test algorithm
15. Examination of blood cultures (Unit SOP)
16. Examination of CSF (Unit SOP)
17. CSF chemical testing using urinalysis strip
18. Examination of LA/PF (Unit SOP- ASSAY-CLA-202 Effusions)
19. Gram stain (Unit SOP)
20. Directigen
21. Optochin, Bile solubility, X+V, Catalase, Coagulase, API (Unit SOP)
22. Antibiotic detection in body fluids
23. Antimicrobial sensitivity testing (Unit SOP)
24. Nasopharyngeal specimen culture
25. Collection of nasopharyngeal swab
26. Salmonella serotyping
27. Storage of isolates
28. Laboratory data entry
29. Cryogenic Shipping Dewar Testing and Shipping (Management of liquid N2 and dry shippers)
30. Safe handling of liquid N2 (Unit SOP-HSE-003)
31. Latex sweep pneumococcal serotyping
32. Safe Storage, Transportation And Decanting Of Liquid Nitrogen (Unit SOP-HSE-008)
33. Enrolment and consent at RCH clinics
34. Vaccination
35. Pneumococcal invasive isolate serotyping (Unit SOP)
36. AcqImm sample collection/transport/processing
37. Blood sample aliquoting for ABD and WB storage
