# Supplementary material for: Standardized study performance, quality assurance, and quality control in a cluster-randomized trial: the Pneumococcal Vaccine Schedules trial
Source: PubMed Central journal article supplement — Trials. 2024 Dec 18;25:836. doi: 10.1186/s13063-024-08677-7 (PMC11654193; doi:10.1186/s13063-024-08677-7), 2024-12-18
Supplement: 13063_2024_8677_MOESM3_ESM.pdf [file 13063_2024_8677_MOESM3_ESM.pdf]

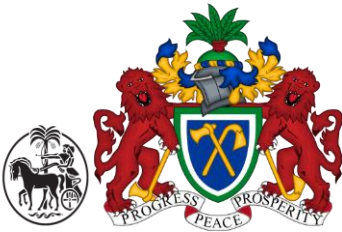

## Pneumococcal Vaccine Schedules Study

### Checklist of procedures to monitor in the Basse laboratory

Date of visit: \_\_\_/\_\_\_/\_\_\_ Name of attendant/s:

#### Evaluation Criteria

| A- EQUIPMENT/DEVICES |                                                                                  |                               |                              |                               |                              |                               |                             |
|----------------------|----------------------------------------------------------------------------------|-------------------------------|------------------------------|-------------------------------|------------------------------|-------------------------------|-----------------------------|
| Thermometer(s)       | Maintenance/Technical control/Functionality                                      | <input type="checkbox"/> POOR |                              | <input type="checkbox"/> FAIR |                              | <input type="checkbox"/> GOOD |                             |
|                      | Calibration                                                                      | <input type="checkbox"/> YES  | <input type="checkbox"/> NO  | Other, _____<br>_____         |                              |                               |                             |
|                      | Comment:                                                                         |                               |                              |                               |                              |                               |                             |
| Refrigerator(s)      | Maintenance/Technical control/Functionality                                      | <input type="checkbox"/> POOR |                              | <input type="checkbox"/> FAIR |                              | <input type="checkbox"/> GOOD |                             |
|                      |                                                                                  | Calibration                   | <input type="checkbox"/> YES | <input type="checkbox"/> NO   | Other, _____<br>_____        |                               |                             |
|                      | Temperature control sheet(s)/recording available and been recorded appropriately |                               |                              |                               | <input type="checkbox"/> YES |                               | <input type="checkbox"/> NO |
|                      | Comment:                                                                         |                               |                              |                               |                              |                               |                             |
|                      | Measurements - if temperature out of range                                       |                               |                              |                               | <input type="checkbox"/> YES |                               | <input type="checkbox"/> NO |
| Comment:             |                                                                                  |                               |                              |                               |                              |                               |                             |

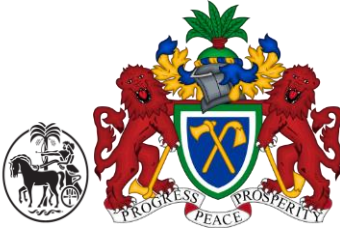

|                                            |                                                                                  |             |                                  |                                |                                  |                              |                                  |                             |  |
|--------------------------------------------|----------------------------------------------------------------------------------|-------------|----------------------------------|--------------------------------|----------------------------------|------------------------------|----------------------------------|-----------------------------|--|
| -70/80°C<br>Freezer(s)                     | Maintenance/Technical control/Functionality                                      |             | <input type="checkbox"/><br>POOR |                                | <input type="checkbox"/><br>FAIR |                              | <input type="checkbox"/><br>GOOD |                             |  |
|                                            |                                                                                  | Calibration | <input type="checkbox"/><br>YES  | <input type="checkbox"/><br>NO | Other, _____<br>_____            |                              |                                  |                             |  |
|                                            | Temperature control sheet(s)/recording available and been recorded appropriately |             |                                  |                                |                                  | <input type="checkbox"/> YES |                                  | <input type="checkbox"/> NO |  |
|                                            | Comment:                                                                         |             |                                  |                                |                                  |                              |                                  |                             |  |
|                                            | Measurements - if temperature out of range                                       |             |                                  |                                |                                  | <input type="checkbox"/> YES |                                  | <input type="checkbox"/> NO |  |
|                                            | Comment:                                                                         |             |                                  |                                |                                  |                              |                                  |                             |  |
| Incubator(s)                               | Maintenance/Technical control/Functionality                                      |             | <input type="checkbox"/><br>POOR |                                | <input type="checkbox"/><br>FAIR |                              | <input type="checkbox"/><br>GOOD |                             |  |
|                                            |                                                                                  | Calibration | <input type="checkbox"/><br>YES  | <input type="checkbox"/><br>NO | Other, _____<br>_____            |                              |                                  |                             |  |
|                                            | CO2 environment                                                                  |             |                                  |                                |                                  | <input type="checkbox"/> YES |                                  | <input type="checkbox"/> NO |  |
|                                            | Comment                                                                          |             |                                  |                                |                                  |                              |                                  |                             |  |
|                                            | Temperature control sheet(s)/recording available and been recorded appropriately |             |                                  |                                |                                  | <input type="checkbox"/> YES |                                  | <input type="checkbox"/> NO |  |
|                                            | Comment:                                                                         |             |                                  |                                |                                  |                              |                                  |                             |  |
| Measurements - if temperature out of range |                                                                                  |             |                                  |                                | <input type="checkbox"/> YES     |                              | <input type="checkbox"/> NO      |                             |  |
| Comment:                                   |                                                                                  |             |                                  |                                |                                  |                              |                                  |                             |  |



|                                |                                                                                  |                          |                          |                          |                       |
|--------------------------------|----------------------------------------------------------------------------------|--------------------------|--------------------------|--------------------------|-----------------------|
| Blood culture device<br>BACTEC | Maintenance/Technical control/Functionality                                      | <input type="checkbox"/> | <input type="checkbox"/> | <input type="checkbox"/> |                       |
|                                |                                                                                  | POOR                     | FAIR                     | GOOD                     |                       |
|                                | <input type="checkbox"/>                                                         | Calibration              | <input type="checkbox"/> | <input type="checkbox"/> | Other, _____<br>_____ |
|                                |                                                                                  | YES                      | NO                       |                          |                       |
|                                | Comment:                                                                         |                          |                          |                          |                       |
|                                | Temperature control sheet(s)/recording available and been recorded appropriately | <input type="checkbox"/> | <input type="checkbox"/> |                          |                       |
|                                |                                                                                  | YES                      | NO                       |                          |                       |
| Comment:                       |                                                                                  |                          |                          |                          |                       |
|                                | Measurements - if out of range                                                   | <input type="checkbox"/> | <input type="checkbox"/> |                          |                       |
|                                |                                                                                  | YES                      | NO                       |                          |                       |
| Comment:                       |                                                                                  |                          |                          |                          |                       |
| Autoclave(s)                   | Maintenance/Technical control/Functionality                                      | <input type="checkbox"/> | <input type="checkbox"/> | <input type="checkbox"/> |                       |
|                                |                                                                                  | POOR                     | FAIR                     | GOOD                     |                       |
|                                | <input type="checkbox"/>                                                         | Calibration              | <input type="checkbox"/> | <input type="checkbox"/> | Other, _____<br>_____ |
|                                | YES                                                                              | NO                       |                          |                          |                       |
| Comment:                       |                                                                                  |                          |                          |                          |                       |
| Microscope(s)                  | Maintenance/Technical control/Functionality                                      | <input type="checkbox"/> | <input type="checkbox"/> | <input type="checkbox"/> |                       |
|                                |                                                                                  | POOR                     | FAIR                     | GOOD                     |                       |
|                                | <input type="checkbox"/>                                                         | Calibration              | <input type="checkbox"/> | <input type="checkbox"/> | Other, _____<br>_____ |
|                                | YES                                                                              | O                        |                          |                          |                       |
| Comment:                       |                                                                                  |                          |                          |                          |                       |
| Safety cabinet(s)              | Maintenance/Technical control/Functionality                                      | <input type="checkbox"/> | <input type="checkbox"/> | <input type="checkbox"/> |                       |
|                                |                                                                                  | POOR                     | FAIR                     | GOOD                     |                       |

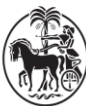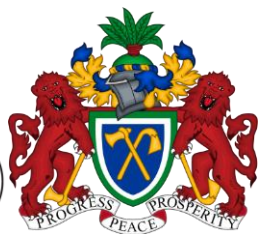

|                     |                                             |                               |                               |                               |
|---------------------|---------------------------------------------|-------------------------------|-------------------------------|-------------------------------|
|                     | Calibration                                 | <input type="checkbox"/> YES  | <input type="checkbox"/> NO   | Other, _____<br>_____         |
| Comment:            |                                             |                               |                               |                               |
| Pipette(s)          | Maintenance/Technical control/Functionality | <input type="checkbox"/> POOR | <input type="checkbox"/> FAIR | <input type="checkbox"/> GOOD |
|                     | Calibration                                 | <input type="checkbox"/> YES  | <input type="checkbox"/> NO   | Other, _____<br>_____         |
|                     | Comment:                                    |                               |                               |                               |
| Centrifuge(s)       | Maintenance/Technical control/Functionality | <input type="checkbox"/> POOR | <input type="checkbox"/> FAIR | <input type="checkbox"/> GOOD |
|                     | Calibration                                 | <input type="checkbox"/> YES  | <input type="checkbox"/> NO   | Other, _____<br>_____         |
|                     | Comment                                     |                               |                               |                               |
| Working Environment | Cleanliness                                 | <input type="checkbox"/> POOR | <input type="checkbox"/> FAIR | <input type="checkbox"/> GOOD |
|                     | Organization                                | <input type="checkbox"/> POOR | <input type="checkbox"/> FAIR | <input type="checkbox"/> GOOD |
|                     | Comment:                                    |                               |                               |                               |

| B - REAGENTS/KITS/MEDIA/REFERENCE STRAINS |                                          |                              |                             |
|-------------------------------------------|------------------------------------------|------------------------------|-----------------------------|
| Reagents/<br>Test kits                    | Storage conditions (as per manufacturer) | <input type="checkbox"/> YES | <input type="checkbox"/> NO |
|                                           | Expiration date (as per manufacturer)    | <input type="checkbox"/> YES | <input type="checkbox"/> NO |
|                                           | Constant supply available                | <input type="checkbox"/> YES | <input type="checkbox"/> NO |

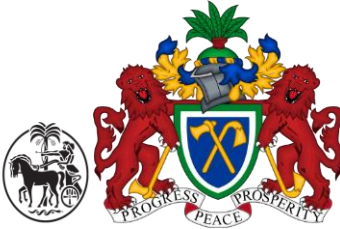

|                             |                                                                        |                              |                             |
|-----------------------------|------------------------------------------------------------------------|------------------------------|-----------------------------|
|                             | Comment:                                                               |                              |                             |
| Pneumococcal antisera       | QC documentation (as per SSP)                                          | <input type="checkbox"/> YES | <input type="checkbox"/> NO |
|                             | Expiration date (as per manufacturer)                                  | <input type="checkbox"/> YES | <input type="checkbox"/> NO |
|                             | Constant supply available                                              | <input type="checkbox"/> YES | <input type="checkbox"/> NO |
|                             | Comment:                                                               |                              |                             |
| Media/<br>Media preparation | Preparation date recorded                                              | <input type="checkbox"/> YES | <input type="checkbox"/> NO |
|                             | Expiration date recorded                                               | <input type="checkbox"/> YES | <input type="checkbox"/> NO |
|                             | Preparation process: appropriate conditions                            | <input type="checkbox"/> YES | <input type="checkbox"/> NO |
|                             | Control of functionality/growth                                        | <input type="checkbox"/> YES | <input type="checkbox"/> NO |
|                             | Control of sterility                                                   | <input type="checkbox"/> YES | <input type="checkbox"/> NO |
|                             | Comment:                                                               |                              |                             |
| Reference strains           | Reference strains used/available                                       | <input type="checkbox"/> YES | <input type="checkbox"/> NO |
|                             | Comment:                                                               |                              |                             |
|                             | Strains stored in appropriate medium (e.g. microbank, glycerol medium) | <input type="checkbox"/> YES | <input type="checkbox"/> NO |
|                             | Comment:                                                               |                              |                             |
|                             | Storage temperature -20°C                                              | <input type="checkbox"/> YES | <input type="checkbox"/> NO |
|                             | Strains handled for sub-cultivation according to SOP                   | <input type="checkbox"/> YES | <input type="checkbox"/> NO |
| Comment:                    |                                                                        |                              |                             |

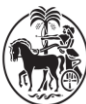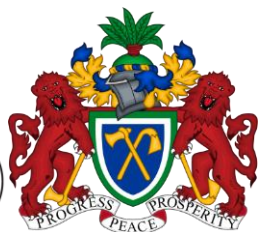

| <b>C - HANDLING OF SPECIMEN</b>                |                                                                         |                              |                             |
|------------------------------------------------|-------------------------------------------------------------------------|------------------------------|-----------------------------|
| Specimen transportation/<br>transfer           | Transportation of specimen as per protocol/SOPs (i.e. temperature/time) | <input type="checkbox"/> YES | <input type="checkbox"/> NO |
|                                                | Specimen recorded in EMR first on reception                             | <input type="checkbox"/> YES | <input type="checkbox"/> NO |
|                                                | Specimen recorded in EMR and log book                                   | <input type="checkbox"/> YES | <input type="checkbox"/> NO |
|                                                | Internal laboratory number given to specimen (if applicable)            | <input type="checkbox"/> YES | <input type="checkbox"/> NO |
|                                                | Comment:                                                                |                              |                             |
| NPS processing                                 | Culturing of NPS STGG as per protocol/SOPs                              | <input type="checkbox"/> YES | <input type="checkbox"/> NO |
|                                                | Identification of cultured microorganisms as per protocol/SOPs          | <input type="checkbox"/> YES | <input type="checkbox"/> NO |
|                                                | Sweep serotyping as per SSP                                             | <input type="checkbox"/> YES | <input type="checkbox"/> NO |
|                                                | Comment:                                                                |                              |                             |
| Blood culture documentation/<br>interpretation | Culture and identification according to protocol                        | <input type="checkbox"/> YES | <input type="checkbox"/> NO |
|                                                | Contamination rate of blood cultures calculated (ideally up to 5%)      | <input type="checkbox"/> YES | <input type="checkbox"/> NO |
|                                                | Measures taken if high contamination rate                               | <input type="checkbox"/> YES | <input type="checkbox"/> NO |
|                                                | Comment                                                                 |                              |                             |
|                                                | Positivity rate of blood cultures (ideally 5%)                          | <input type="checkbox"/> YES | <input type="checkbox"/> NO |
|                                                | Measures taken if low positivity rate                                   | <input type="checkbox"/> YES | <input type="checkbox"/> NO |
|                                                | Comment                                                                 |                              |                             |

| <b>D – QUALITY CONTROL</b> |                                                               |                              |                             |
|----------------------------|---------------------------------------------------------------|------------------------------|-----------------------------|
| Internal quality control   | Control of testing done regularly using the reference strains | <input type="checkbox"/> YES | <input type="checkbox"/> NO |
|                            | Control of identification reactions according to SOPs         | <input type="checkbox"/> YES | <input type="checkbox"/> NO |
|                            | Comment:                                                      |                              |                             |

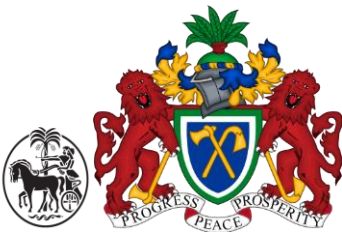

|                          |                                                                                                                                        |                              |                                                              |
|--------------------------|----------------------------------------------------------------------------------------------------------------------------------------|------------------------------|--------------------------------------------------------------|
| External quality control | Does the laboratory participate in an external quality control program for microbiology?                                               | <input type="checkbox"/> YES | <input type="checkbox"/> NO                                  |
|                          | If "Yes", state the external quality control program and result of most recent evaluation. Check documentation is filed in laboratory. | _____                        |                                                              |
|                          | Quarterly external QC of sweep serotyping done?                                                                                        | <input type="checkbox"/> YES | <input type="checkbox"/> NO <input type="checkbox"/> NOT DUE |
|                          | If yes, result – agreement for x/y STGG specimens                                                                                      |                              |                                                              |
| Comment:                 |                                                                                                                                        |                              |                                                              |

| E – NPS & BC SAMPLE MONITORING |                                                               |                              |                             |
|--------------------------------|---------------------------------------------------------------|------------------------------|-----------------------------|
| NPS                            | Pick two sample ID from reception logbook and follow through: |                              |                             |
|                                | Is sample recorded in lab EMR?                                | <input type="checkbox"/> YES | <input type="checkbox"/> NO |
|                                | If sample is isolate is it stored?                            | <input type="checkbox"/> YES | <input type="checkbox"/> NO |
|                                | Comment:                                                      |                              |                             |
| BC                             | Pick two sample ID from reception logbook and follow through: |                              |                             |
|                                | Is sample recorded in lab EMR?                                | <input type="checkbox"/> YES | <input type="checkbox"/> NO |
|                                | If sample is isolate, is it stored?                           | <input type="checkbox"/> YES | <input type="checkbox"/> NO |
|                                | Comment:                                                      |                              |                             |

| F - STANDARD OPERATING PROCEDURES/TRAINING |                                                                   |                              |                             |
|--------------------------------------------|-------------------------------------------------------------------|------------------------------|-----------------------------|
| Standard Operating Procedures (SOPs)       | PVS SOPs available & used                                         | <input type="checkbox"/> YES | <input type="checkbox"/> NO |
|                                            | Monthly/Quarterly staff proficiency documented                    |                              |                             |
|                                            | Comment                                                           |                              |                             |
|                                            | Additional SOPs of collaborators available & used (If applicable) | <input type="checkbox"/> YES | <input type="checkbox"/> NO |
|                                            | Comment                                                           |                              |                             |
|                                            | Reference literature available & used                             | <input type="checkbox"/> YES | <input type="checkbox"/> NO |

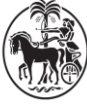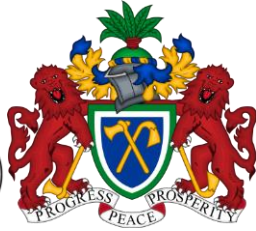

|                                   |                                |                              |                             |
|-----------------------------------|--------------------------------|------------------------------|-----------------------------|
| Reference literature/<br>Training | Comment                        |                              |                             |
|                                   | Training of staff at site      | <input type="checkbox"/> YES | <input type="checkbox"/> NO |
|                                   | Comment/Trained on:            |                              |                             |
|                                   | Comment/Frequency of training: |                              |                             |

**Evaluation Outcome/comments: –**

**Recommendations/Action points:**

**Name of person conducting supervision:**
