# Supplementary material for: Standardized study performance, quality assurance, and quality control in a cluster-randomized trial: the Pneumococcal Vaccine Schedules trial
Source: PubMed Central journal article supplement — Trials. 2024 Dec 18;25:836. doi: 10.1186/s13063-024-08677-7 (PMC11654193; doi:10.1186/s13063-024-08677-7), 2024-12-18
Supplement: 13063_2024_8677_MOESM4_ESM.pdf [file 13063_2024_8677_MOESM4_ESM.pdf]

## Additional File 4

### Overview of PVS QA/QC Activities

| Component         | Description                                           | Major functions                                                                                                                                                                                                       |
|-------------------|-------------------------------------------------------|-----------------------------------------------------------------------------------------------------------------------------------------------------------------------------------------------------------------------|
| <b>Clinical</b>   |                                                       |                                                                                                                                                                                                                       |
|                   | Development of standard operating procedure documents | Ensure standardization of activities across all facilities and RCH clinics<br>Used for training new staff and re-training of existing staff                                                                           |
|                   | Staff training and Certification                      | Ensure compliance with ICH-GCP guidelines<br>Ensure that staff are proficient in study-related procedures                                                                                                             |
|                   | Development of supervisory checklist                  | Enable a standard approach to internal monitoring of study staff adherence to the protocol and SSPs<br>Ensure the supervision of clinical and laboratory activities in a structured manner                            |
|                   | Supportive supervisory visits to health facilities    | Enable the detection of recruitment and protocol adherence issues and prompt resolution<br>Provide support for clinical staff during busy periods<br>Enable the real-time monitoring of study procedures at all sites |
|                   | Weekly progress meetings                              | To review progress in recruitment, clinical endpoint surveillance, and data quality<br>Avenue to discuss practical challenges and solutions                                                                           |
|                   | Monthly QA meetings                                   | Reporting of aggregated monthly data reporting performance against key indicators                                                                                                                                     |
|                   | Radiology                                             | Established methods to perform and interpret X-rays according to WHO recommendations                                                                                                                                  |
| <b>Laboratory</b> |                                                       |                                                                                                                                                                                                                       |
|                   | Development of standard operating procedure documents | Provides guidelines for all laboratory processes and procedures<br>Used for training new staff and re-training of existing staff                                                                                      |
|                   | External QC of conventional microbiology              | Provide objective checks of the laboratory's analytical performance using an external agency and ensure long-term accuracy for peer comparison.                                                                       |

|                                                                                     |                                                                                                                              |
|-------------------------------------------------------------------------------------|------------------------------------------------------------------------------------------------------------------------------|
| Inter-operator internal QC of sweep serotyping of NP samples                        | Ensure consistency in results of primary endpoint measurement                                                                |
| External QC using spiked nasopharyngeal specimens from MCRI                         | To check the performance of the project NP culture and serotyping process and procedures                                     |
| External QC using pneumococcal microarray serotyping by SGUL                        | To validate the latex sweep serotyping method                                                                                |
| 100% verification of laboratory logbook serotyping results compared to LEMR results | Ensures that discrepancies arising from data entry errors and transcription errors are identified and resolved prospectively |
| <b>Field</b>                                                                        |                                                                                                                              |
| Weekly progress meetings                                                            | Focus on the review of query resolution and new issues arising                                                               |
| Enrolment using an optimal sampling frame                                           | Ensures eligible participants are enrolled                                                                                   |
| Linkage of identity of individual participants                                      | Allows the linkage of the identity of individual participants across all study database                                      |
| Vaccination delivery and recording of vaccination data using the RVS                | Enables real-time vaccination data documentation and verification                                                            |
| <b>Data</b>                                                                         |                                                                                                                              |
| Development of Data Management Plan                                                 | Provides a detailed approach to managing data, both at the data collection centres and data management units                 |
| Development of data-related standard operating procedures                           | Provides guidelines for all data collection applications usage and procedures to follow during query-solving                 |
| Weekly generation of data quality reports                                           | Clinical, field and laboratory data queries are generated weekly by the data manager for resolution by trial staff           |
| Monthly QA data reports                                                             | Prepare monthly QA data reports for primary and secondary endpoints                                                          |
| Periodic data support visits to the various trial sites                             | Enable the data team to engage the trial staff on the types of queries generated and assist them in resolving the queries    |

- RCH, Reproductive and Child Health; ICH-GCP, International Conference on Harmonisation – Good Clinical Practice NP, Nasopharyngeal; WHO, World Health Organization; QA, Quality Assurance; QC, Quality Control; MCRI, Murdoch Children’s Research Institute; SGUL, St Georges University of London; RVS, Real-time electronic Vaccination recording System; LEMR, Laboratory Electronic Medical Records; SOP, Standard Operating Procedures
